# Supplementary material
Source: Springer Nature journal article supplement (https://www.springermedizin.de/resource/supplementary/12903_2013_302_MOESM1_ESM.pdf/9516566)

■ Ajman University Dental training centre ■ Government training centre ■ Out of UAE

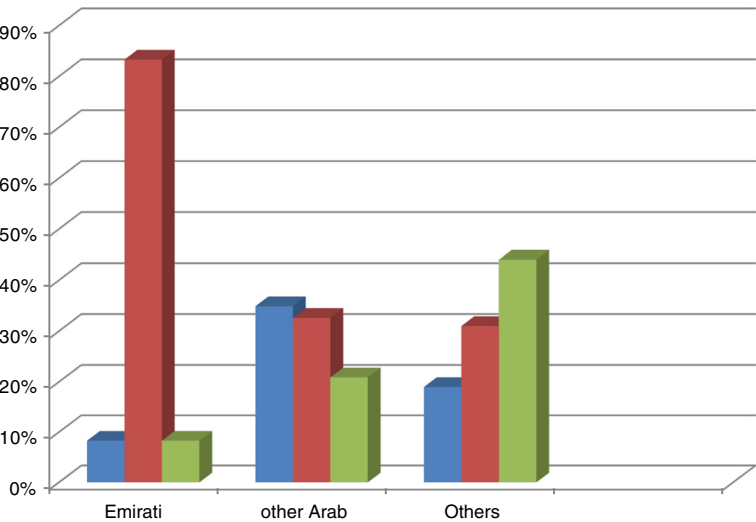

Supplement: MOESM1 [file 9516566]
